# Supplementary material for: Optically and electrically modulated printed carbon nanotube synaptic transistors with a single input terminal and multi-functional output characteristics
Source: Royal Society of Chemistry journal article supplement (doi:10.1039/d0tc01156h), 2020-01-01
Supplement: d0tc01156h1.pdf [file d0tc01156h1.pdf]

## Supporting Information

### **Optically and Electrically Modulated Printed Carbon Nanotube Synaptic transistors with Single Input Terminal and Multi-functional Output Characteristics**

Lin Shao<sup>&1</sup>, Min Li<sup>&1,2</sup>, Peisong Wu<sup>3</sup>, Fang Wang<sup>3</sup>, Shulin Chen<sup>1</sup>, Weida Hu<sup>3</sup>, Hua Wang<sup>\*2</sup>,  
Zheng Cui<sup>\*1</sup>, Jianwen Zhao<sup>\*1</sup>

<sup>1</sup>Printable Electronics Research Centre, Suzhou Institute of Nano-Tech and Nano-Bionics, Chinese Academy of Sciences, 398 Ruoshui Road, Suzhou 215123, P.R. China.

<sup>2</sup>Key Laboratory of Interface Science and Engineering in Advanced Materials of Ministry of Education, Taiyuan University of Technology, NO.79, Yingze West Main Street, Taiyuan, 030024, P.R. China.

<sup>3</sup>State Key Laboratory of Infrared Physics Shanghai Institute of Technical Physics, Chinese Academy of Sciences, 500 Yutian Road, Shanghai 200083, P.R. China.

E-mail: jwzhao2011@sinano.ac.cn, wanghua001@tyut.edu.cn, [zcui2009@sinano.ac.cn](mailto:zcui2009@sinano.ac.cn).

<sup>&</sup>Lin Shao and Min Li contributed equally to this paper.

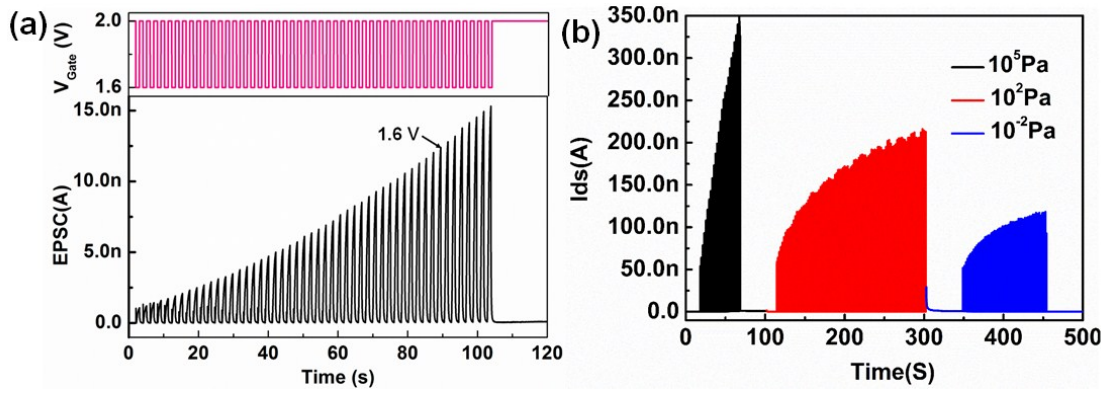

**Figure S1.** (a) Amplitude of EPSC increases gradually with the successive pulsed voltage stimulus for the phosphorous-doped silicon gate synaptic transistor device (from 2 to 1.6 V). (b) The light-response properties of a printed carbon nanotube transistor (using boron-doped silicon as the gate electrode) under different atmospheric pressures at  $V_{Gate} = 2$  V and  $V_{DS} = -0.5$  V (the laser wavelength is 532 nm; the optical pulse frequency is 0.5 Hz; the power of laser is 50 mW).

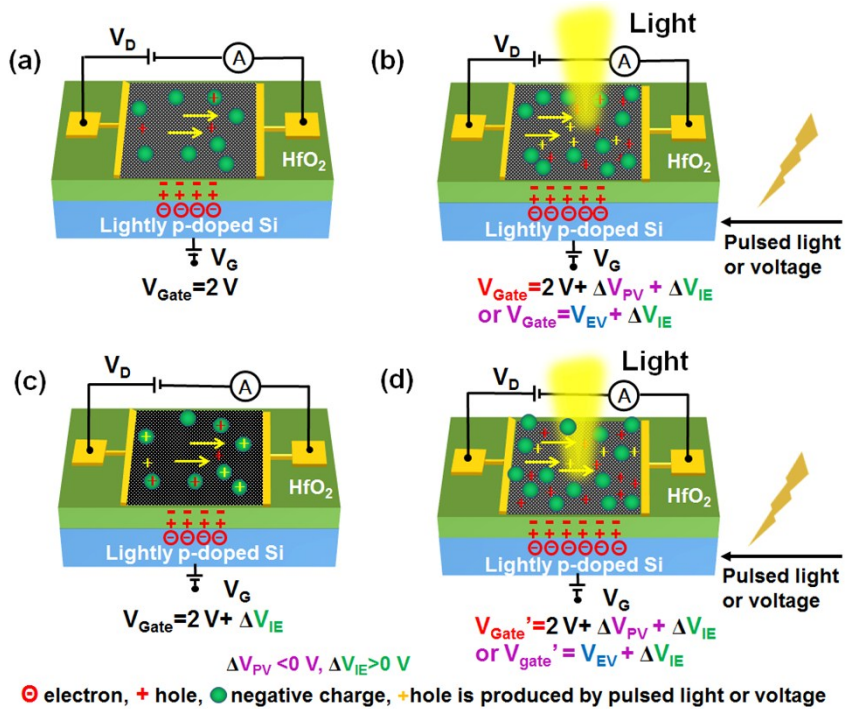

**Figure S2.** Schematic of carrier distributions in an optically and electrically modulated carbon nanotube synaptic transistor under the pulsed optical and electrical signals. (a) Without and (b) with optical or electrical signals, and second optical pulse cycle (c) without and (d) with optical

or electrical signal stimulation.  $V_{EV}$ ,  $\Delta V_{PV}$  and  $\Delta V_{IE}$  represent the gate voltage, the changes of the photogating voltage and the induced voltage.

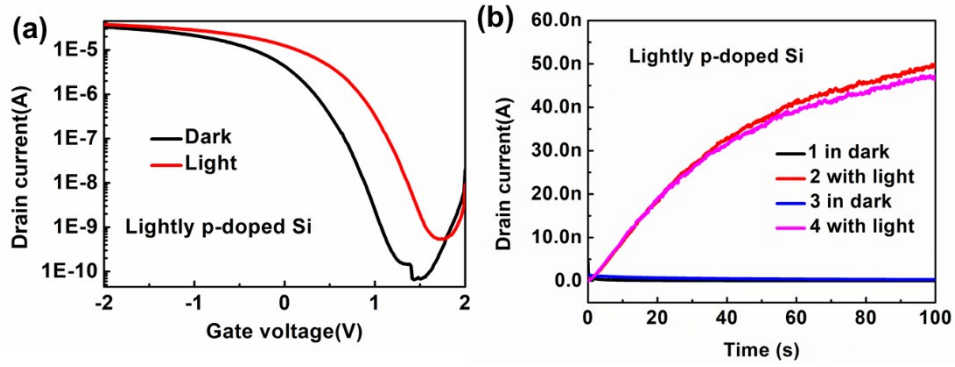

**Figure S3** (a) Transfer curves under the light and dark conditions, and (b) the relationship between drain current and time under light and dark (1-4 are the test sequences).

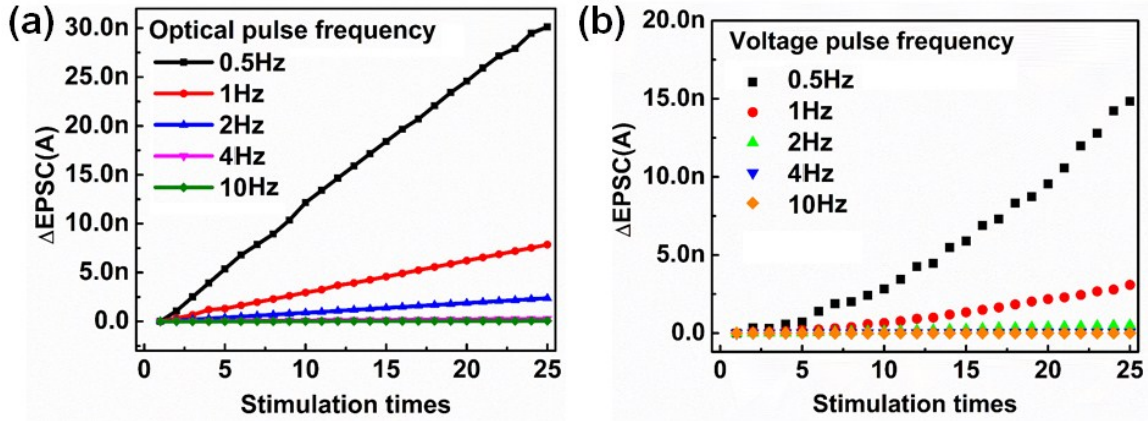

**Figure S4.**  $\Delta EPSC$ s is defined as “An-A1”, which is recorded for pre-synaptic pulse sequence under different (a) gate voltage and (b) light pulse frequency (the power of light is 50 mw).

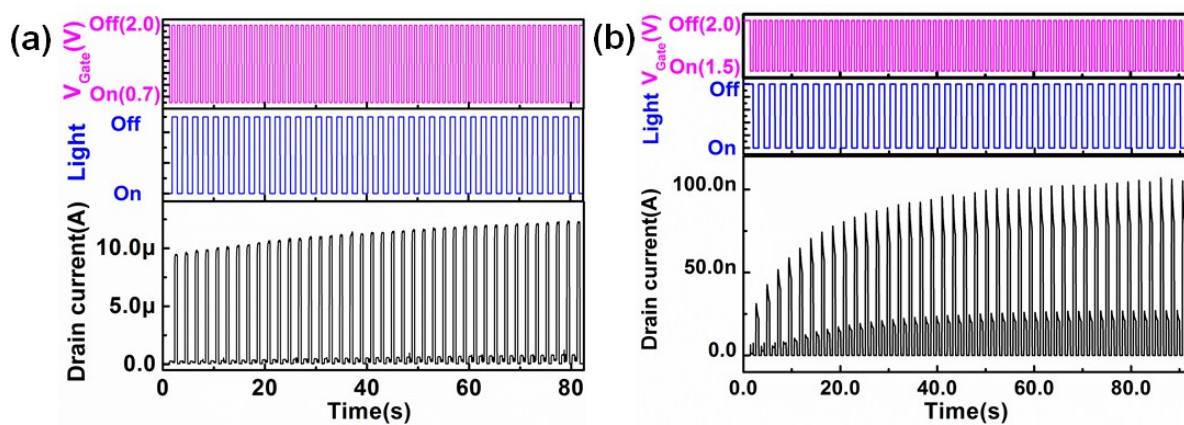

**Figure S5.** "NOR" logic operation with 40 cycles. Gate voltages of 2.0 and 0.7 or 1.5 V are regarded as the binary "1" and "0", and the light is on as "0" and off as "1", respectively.
